# Supplementary material for: Water enhances the formation of fragmentation products via the cross-reactions of RO&lt;sub&gt;2&lt;/sub&gt; and HO&lt;sub&gt;2&lt;/sub&gt; in the photooxidation of isoprene
Source: Copernicus journal article supplement (doi:10.5194/acp-2022-444), 2022-07-25
Supplement: Supplementary file 1 [file acp-2022-444-supplement.pdf]

*Supplement of*

**Water enhances the formation of fragmentation products via the cross-reactions of RO<sub>2</sub> and HO<sub>2</sub> in the photooxidation of isoprene**

**Jiayun Xu et al.**

*Correspondence to:* Zhongming Chen (zmchen@pku.edu.cn)

The copyright of individual parts of the supplement might differ from the article licence.

## 1 Calculation of OH exposure ( $OH_{exp}$ )

2  $OH_{exp}$  equals the product of OH concentration and exposure time of reactants in the reaction system. It  
3 serves as a characterization of the oxidation process by OH radical. We used the decay of isoprene to  
4 calculate  $OH_{exp}$  under different exposure times before its concentration decreased below the detection  
5 limit (Eq. (S1)) (Lambe et al., 2011). The concentrations of MACR and MVK reached the peak almost at  
6 the same time when the concentration of isoprene fell below the detection limit. We define the measured  
7 peak concentrations of MACR and MVK as  $[MACR]_{t0}$  and  $[MVK]_{t0}$ . When the concentration of  
8 isoprene was too low to be detected ( $<5$  ppbv), an additional  $OH_{exp}$  ( $OH_{exp,add}$ , Eq. (S2)) determined  
9 from MACR and MVK decay was added to  $OH_{exp}$ . The calculation results of  $OH_{exp}$  in Exp. 1–4 were  
10 shown in Fig. S1. The uncertainty of  $OH_{exp}$  is within  $\pm 15\%$ .

$$11 \quad OH_{exp} = \frac{1}{k_{OH,ISO}} \times -\ln \frac{[ISO]_t}{[ISO]_0} \quad (S1)$$

$$12 \quad OH_{exp,add} = \frac{1}{2} \times \frac{1}{k_{OH,ISO}} \times (-\ln \frac{[MACR]_t}{[MACR]_{t0}} + -\ln \frac{[MVK]_t}{[MVK]_{t0}}) \quad (S2)$$

## 13 Calculation of atmospheric equivalent photochemical age (atmospheric EPA)

14 Atmospheric EPA refers to the equivalent time scale of photooxidation in a certain experiment to that in  
15 the ambient atmosphere, generally in a unit of hours or days. It can be calculated with Eq. (S3). Here we  
16 used the average OH concentration in the troposphere measured by Mao et al. (2009),  $1.5 \times 10^6$  molec  
17  $cm^{-3}$ , as a surrogate for atmospheric OH concentration ( $[OH]$ ).

$$18 \quad Atmospheric \text{ EPA (hrs)} = \frac{OH_{exp}}{[OH] \times 3600} \quad (S3)$$

## 19 Corrections for products molar yields

20 We made a series of corrections to eliminate the effect of secondary OH oxidation, photolysis, and wall  
21 loss of concerning products on the determination of their actual yields. The correction for secondary OH  
22 oxidation was achieved by multiplying the correction factor  $F_{1PRO,i}(t)$  (Eq. (S5)) (Ruppert and Heinz  
23 Becker, 2000) to the observed molar yields  $Y_{PRO,i}(t)$  (Eq. (S4)). A second correction factor,  $F_{2PRO,i}(t)$   
24 (Eq. (S7)), derived from pseudo first-order reaction kinetic equation was applied to correct wall loss and  
25 photolysis loss. First-order wall loss and photolysis rate constants ( $k_{WALL,i}$  and  $k_{PH,i}$ ) and second-order  
26 OH reaction rate constants ( $k_{PRO,i+OH}$ ) for the concerned products in our experiments were listed in Table  
27 S2, S3 and S4.

$$Y_{PRO,i}(t) = \frac{\Delta M_{PRO,i}(t)}{\Delta M_{ISO}(t)} \quad (S4)$$

$$F_{1\ PRO,i}(t) = \left( \frac{k_{ISO+OH} - k_{PRO,i+OH}}{k_{ISO+OH}} \right) \left( \frac{1 - C_t}{C_t^{k_{PRO,i+OH}/k_{ISO+OH} - C_t}} \right) \quad (S5)$$

$$C_t = [ISO]_t / [ISO]_0 \quad (S6)$$

$$F_{2\ PRO,i}(t) = e^{-k_{WALL,i} \times t - k_{PH,i} \times t} \quad (S7)$$

$$Y'_{PRO,i}(t) = Y_{PRO,i}(t) \times F_{1\ PRO,i}(t) / F_{2\ PRO,i}(t) \quad (S8)$$

### Determination of OH and HO<sub>2</sub> concentrations

OH, and HO<sub>2</sub> concentrations are basic inputs in model simulations. In the present study, the photooxidation process in the OFR was divided into six sampling periods (0–10 s, 11–20 s, 21–30 s, 31–40 s, 41–50 s, 51–61 s). The average OH concentration in each sampling period was obtained by dividing the increment of OH<sub>exp</sub> and residence time in this period. HO<sub>2</sub> was constrained by H<sub>2</sub>O<sub>2</sub> concentrations measured in the experiments (see Fig. S3). Eq. (S9), derived from the mass balance for production and loss of H<sub>2</sub>O<sub>2</sub>, was used to calculate HO<sub>2</sub> concentration in individual sampling periods. The dominant production pathways for H<sub>2</sub>O<sub>2</sub> in the experiments were self-combination of OH and disproportionation of HO<sub>2</sub>, while the major loss pathway was its reaction with OH.  $P_{H_2O_2}$ ,  $[OH]$  and  $[H_2O_2]$  in Eq. (S9) refers to the average value of H<sub>2</sub>O<sub>2</sub> production rate, OH concentration, and H<sub>2</sub>O<sub>2</sub> concentration in each sampling period. The related reaction rate constants are available in Atkinson et al. (2004).

$$[HO_2] = \sqrt{\frac{P_{H_2O_2} - k_{OH+OH} [OH]^2 + k_{OH+H_2O_2} [OH][H_2O_2]}{k_{HO_2+HO_2}}} \quad (S9)$$

### Distribution of RO<sub>2</sub> reaction pathways

We calculated the distribution of RO<sub>2</sub> reaction pathways in the experiments under four conditions based on the reaction rates of HO<sub>2</sub>, RO<sub>2</sub>, and H-shift pathways (units: s<sup>-1</sup>) following the method in Liu et al. (2013). Total RO<sub>2</sub> concentrations in the four experiments were simulated employing a box model. The determination of HO<sub>2</sub> concentrations has been described above. For Exp.1 and 2 representing first-generation reactions, RO<sub>2</sub> here refers to β-1,2-ISOPPOO and β-4,3-ISOPPOO. The reaction rate constants for HO<sub>2</sub>, RO<sub>2</sub>, and H-shift pathways are the weighted mean values for the two isomers. For Exp. 3 and 4 representing multi-generation reactions, RO<sub>2</sub> refers to the assembling of a series of RO<sub>2</sub> the sum of whose concentrations takes more than 90 % of the total concentration of RO<sub>2</sub> (specifically, ISOPBO<sub>2</sub>, ISOPDO<sub>2</sub>,

55 C59O2, CH3O2, C57O2, C58AO2, HMKBO2 and CHOMOHCO3, the names of the above-mentioned  
 56 RO<sub>2</sub> are consistent with those in MCM v3.3.1). The results are presented in Fig. S2.

## 57 Parameterization of the water effect on reaction rate constants

58 Previous studies have pointed out that water vapor can accelerate the self-reactions of RO<sub>2</sub> via the  
 59 formation of water complexes (RO<sub>2</sub>·H<sub>2</sub>O) (Clark et al., 2008; Clark et al., 2010; Kumbhani et al., 2015).  
 60 We assume this water effect also exists in the HO<sub>2</sub> reactions with RO<sub>2</sub> in that HO<sub>2</sub> can complex with H<sub>2</sub>O  
 61 as well (Kircher and Sander, 1984). Here we referred to an experimental study based on β-hydroxy ethyl  
 62 peroxy (β-HEP), whose structure and binding energy with H<sub>2</sub>O are similar to that of β-ISOPPOO, to  
 63 parameterize this water effect on the RO<sub>2</sub> and HO<sub>2</sub> reactions with β-ISOPPOO isomers (Kumbhani et al.,  
 64 2015). An additional term  $k'_{RO_2(HO_2)}$  (Eq. (S10)) was added to their rate constants in MCM v3.3.1.  
 65  $R_{RO_2(HO_2) \cdot H_2O}$  and  $R_{\beta-HEP \cdot H_2O}$  refers to the relative abundance of RO<sub>2</sub>- (or HO<sub>2</sub>-) water complexes  
 66 and β-HEP-water complexes, separately, and their values are available in Table S5. The term  
 67  $(13.2 \times 10^{-44} e^{9538/T} \times [H_2O])$  represents the temperature- and water-dependent calibration for the  
 68 self-reaction rate constant of β-HEP derived from Kumbhani et al. (2015). For the HO<sub>2</sub> reaction with β-  
 69 ISOPPOO isomers,  $R_{RO_2(HO_2) \cdot H_2O}$  in Eq. S10 was replaced by the geometric average of the relative  
 70 abundance of HO<sub>2</sub>·H<sub>2</sub>O and β-ISOPPOO·H<sub>2</sub>O ( $\sqrt{R_{HO_2 \cdot H_2O} R_{\beta-ISOPPOO \cdot H_2O}}$ ). Same reaction rate constants  
 71 were given to β-ISOPPOO permutation reactions with all related RO<sub>2</sub> species in isoprene photooxidation  
 72 for simplification.

$$73 \quad k'_{RO_2(HO_2)} = \frac{R_{RO_2(HO_2) \cdot H_2O}}{R_{\beta-HEP \cdot H_2O}} \times (13.2 \times 10^{-44} e^{9538/T} \times [H_2O]) \quad (S10)$$

## 74 Chemicals

75 The following chemicals were used to prepare standard solutions for instrument calibration without  
 76 purification: hydrogen peroxide (H<sub>2</sub>O<sub>2</sub>; Alfa Aesar, 35 wt. %), formaldehyde (HCHO; Sigma-Aldrich, 37  
 77 wt. %), glyoxal (GLY; Sigma-Aldrich, 40 wt. %), methylglyoxal (MGLY; Sigma-Aldrich, 40 wt. %),  
 78 hydroxy acetone (HACE; Sigma-Aldrich, 90 %), methacrolein (MACR; Sigma-Aldrich, 96 %), formic  
 79 acid (FA; Sigma-Aldrich, 98 %), acetic acid (AA; Sigma-Aldrich, 99.7 %).

80 Other chemicals used in the experiments: ammonia solution and ammonium chloride (NH<sub>3</sub>·H<sub>2</sub>O and  
 81 NH<sub>4</sub>Cl, Beijing Tongguang Fine Chemicals Company, 25.0–28.0 % and ≥ 99.5 %), potassium iodide (KI;

82 Aladdin Chemical Inc., Shanghai, China, 99.99 %), orthophosphoric acid ( $\text{H}_3\text{PO}_4$ ; Fluka, 85–90 %),  
83 hemin (Sigma-Aldrich,  $\geq 98.0$  %), 4-hydroxyphenyl acetic acid (Alfa Aesar, 99 %). They were used  
84 without purification as well.

85 **Figure captions.**

86 **Figure S1.** The evolution of  $\text{OH}_{\text{exp}}$  with residence time in Exp. 1–4 (a–d).

87 **Figure S2.** Distribution of reaction pathways of major  $\text{RO}_2$  in the experiments. Major  $\text{RO}_2$  refers to  $\text{RO}_2$   
88 species which consist of more than 90 % of total  $\text{RO}_2$  concentrations. In (a) Exp. 1 and (b) Exp. 2 it refers  
89 to  $\beta$ -ISOPPOO, while in (c) Exp. 3 and (d) Exp. 4 refers to the assembly of a series of  $\text{RO}_2$ .

90 **Figure S3.** The observed evolution of  $\text{H}_2\text{O}_2$  concentration in the experiments. Corrections have been  
91 made to eliminate photolysis and wall loss of  $\text{H}_2\text{O}_2$ . The error bars represent  $\pm$  standard deviation ( $\pm$  SD)  
92 based on 6 measurements.

93 **Table captions.**

94 **Table S1.** Collection efficiencies for different species by the rinsing solution ( $5 \times 10^{-3}$  M  $\text{H}_3\text{PO}_4$  or  
95 ultrapure water) in the coiling tube at 277 K.

96 **Table S2.** First-order wall loss rate constants ( $k_{WALL,i}$ ) of the concerned products in the OFR.

97 **Table S3.** First-order photolysis rate constants ( $k_{PH,i}$ ) of the concerned products in the OFR.

98 **Table S4.** Second-order reaction rate constants of the concerned products with OH radicals at 298 K  
99 ( $k_{PRO,i+OH}$ ). The reaction rate constants were abstracted from MCM v3.3.1 website  
100 (<http://mcm.york.ac.uk/home.htm>) except for that of HMHP and  $\beta$ -ISOPOOH, which were abstracted from  
101 Allen et al. (2018) and St Clair et al. (2016), separately.

102 **Table S5.** Relative abundance of  $\text{RO}_2$  ( $\text{HO}_2$ ) water complexes ( $R_{\text{RO}_2(\text{HO}_2) \cdot \text{H}_2\text{O}}$ ) at 298 K under 30 % and  
103 80 % RH.

104 **Table S6.** Advanced mechanisms and kinetics of isoprene photooxidation to MCM v3.3.1 in the modeling  
105 in this study.

106 **References**

- 107 Allen, H. M., Crounse, J. D., Bates, K. H., Teng, A. P., Krawiec-Thayer, M. P., Rivera-Rios, J. C., Keutsch,  
 108 F. N., St Clair, J. M., Hanisco, T. F., Moller, K. H., Kjaergaard, H. G. and Wennberg, P. O.: Kinetics and  
 109 product yields of the OH initiated oxidation of hydroxymethyl hydroperoxide, *J. Phys. Chem. A*, 122,  
 110 6292-6302, doi: 10.1021/acs.jpca.8b04577, 2018.
- 111 Atkinson, R., Baulch, D. L., Cox, R. A., Crowley, J. N., Hampson, R. F., Hynes, R. G., Jenkin, M. E.,  
 112 Rossi, M. J. and Troe, J.: Evaluated kinetic and photochemical data for atmospheric chemistry: Volume I  
 113 - gas phase reactions of O<sub>x</sub>, HO<sub>x</sub>, NO<sub>x</sub> and SO<sub>x</sub> species, *Atmos. Chem. Phys.*, 4, 1461-1738, doi:  
 114 10.5194/acp-4-1461-2004, 2004.
- 115 Atkinson, R., Baulch, D. L., Cox, R. A., Crowley, J. N., Hampson, R. F., Hynes, R. G., Jenkin, M. E.,  
 116 Rossi, M. J., Troe, J. and Subcommittee, I.: Evaluated kinetic and photochemical data for atmospheric  
 117 chemistry: Volume II - gas phase reactions of organic species, *Atmos. Chem. Phys.*, 6, 3625-4055, doi:  
 118 10.5194/acp-6-3625-2006, 2006.
- 119 Boyd, A. A., Flaud, P. M., Daugey, N. and Lesclaux, R.: Rate constants for RO<sub>2</sub> + HO<sub>2</sub> reactions measured  
 120 under a large excess of HO<sub>2</sub>, *J. Phys. Chem. A*, 107, 818-821, doi: 10.1021/jp026581r, 2003.
- 121 Clark, J., Call, S. T., Austin, D. E. and Hansen, J. C.: Computational study of isoprene hydroxyalkyl  
 122 peroxy radical-water complexes (C<sub>5</sub>H<sub>8</sub>(OH)O<sub>2</sub>·H<sub>2</sub>O), *J. Phys. Chem. A*, 114, 6534-6541, doi:  
 123 10.1021/jp102655g, 2010.
- 124 Clark, J., English, A. M., Hansen, J. C. and Francisco, J. S.: Computational study on the existence of  
 125 organic peroxy radical-water complexes (RO<sub>2</sub>·H<sub>2</sub>O), *J. Phys. Chem. A*, 112, 1587-1595, doi:  
 126 10.1021/jp077266d, 2008.
- 127 Dovrou, E., Rivera-Rios, J. C., Bates, K. H. and Keutsch, F. N.: Sulfate formation via cloud processing  
 128 from isoprene hydroxyl hydroperoxides (ISOPOOH), *Environ. Sci. Technol.*, 53, 12476-12484, doi:  
 129 10.1021/acs.est.9b04645, 2019.
- 130 Gong, Y. W. and Chen, Z. M.: Quantification of the role of stabilized Criegee intermediates in the  
 131 formation of aerosols in limonene ozonolysis, *Atmos. Chem. Phys.*, 21, 813-829, doi: 10.5194/acp-  
 132 21-813-2021, 2021.
- 133 Gong, Y. W., Chen, Z. M. and Li, H.: The oxidation regime and SOA composition in limonene ozonolysis:  
 134 roles of different double bonds, radicals, and water, *Atmos. Chem. Phys.*, 18, 15105-15123, doi:  
 135 10.5194/acp-18-15105-2018, 2018.
- 136 Huang, D., Chen, Z. M., Zhao, Y. and Liang, H.: Newly observed peroxides and the water effect on the



137 formation and removal of hydroxyalkyl hydroperoxides in the ozonolysis of isoprene, *Atmos. Chem.*  
 138 *Phys.*, 13, 5671-5683, doi: 10.5194/acp-13-5671-2013, 2013.

139 Kircher, C. C. and Sander, S. P.: Kinetics and mechanism of HO<sub>2</sub> and DO<sub>2</sub> disproportionations, *J. Phys.*  
 140 *Chem.*, 88, 2082-2091, doi: 10.1021/j150654a029, 1984.

141 Kumbhani, S. R., Cline, T. S., Killian, M. C., Clark, J. M., Keeton, W. J., Hansen, L. D., Shirts, R. B.,  
 142 Robichaud, D. J. and Hansen, J. C.: Water vapor enhancement of rates of peroxy radical reactions, *Int. J.*  
 143 *Chem. Kinet.*, 47, 395-409, doi: 10.1002/kin.20917, 2015.

144 Lambe, A. T., Ahern, A. T., Williams, L. R., Slowik, J. G., Wong, J. P. S., Abbatt, J. P. D., Brune, W. H.,  
 145 Ng, N. L., Wright, J. P., Croasdale, D. R., Worsnop, D. R., Davidovits, P. and Onasch, T. B.:  
 146 Characterization of aerosol photooxidation flow reactors: heterogeneous oxidation, secondary organic  
 147 aerosol formation and cloud condensation nuclei activity measurements, *Atmos. Meas. Tech.*, 4, 445-  
 148 461, doi: 10.5194/amt-4-445-2011, 2011.

149 Liu, Y. J., Herdinger-Blatt, I., McKinney, K. A. and Martin, S. T.: Production of methyl vinyl ketone and  
 150 methacrolein via the hydroperoxyl pathway of isoprene oxidation, *Atmos. Chem. Phys.*, 13, 5715-  
 151 5730, doi: 10.5194/acp-13-5715-2013, 2013.

152 Mao, J., Ren, X., Brune, W. H., Olson, J. R., Crawford, J. H., Fried, A., Huey, L. G., Cohen, R. C., Heikes,  
 153 B., Singh, H. B., Blake, D. R., Sachse, G. W., Diskin, G. S., Hall, S. R. and Shetter, R. E.: Airborne  
 154 measurement of OH reactivity during INTEX-B, *Atmos. Chem. Phys.*, 9, 163-173, doi: 10.5194/acp-  
 155 9-163-2009, 2009.

156 McElroy, W. J. and Waygood, S. J.: Oxidation of formaldehyde by the hydroxyl radical in aqueous-  
 157 solution, *CS. Faraday trans.*, 87, 1513-1521, doi: 10.1039/ft9918701513, 1991.

158 Monod, A., Chebbi, A., Durand-Jolibois, R. and Carlier, P.: Oxidation of methanol by hydroxyl radicals  
 159 in aqueous solution under simulated cloud droplet conditions, *Atmos. Environ.*, 34, 5283-5294, doi:  
 160 10.1016/S1352-2310(00)00191-6, 2000.

161 Ruppert, L. and Heinz Becker, K.: A product study of the OH radical-initiated oxidation of isoprene:  
 162 formation of C<sub>5</sub>-unsaturated diols, *Atmos. Environ.*, 34, 1529-1542, doi:  
 163 [https://doi.org/10.1016/S1352-2310\(99\)00408-2](https://doi.org/10.1016/S1352-2310(99)00408-2), 2000.

164 Sander, R.: Compilation of Henry's law constants (version 4.0) for water as solvent, *Atmos. Chem. Phys.*,  
 165 15, 4399-4981, doi: 10.5194/acp-15-4399-2015, 2015.

166 St Clair, J. M., Rivera-Rios, J. C., Crounse, J. D., Knap, H. C., Bates, K. H., Teng, A. P., Jorgensen, S.,  
 167 Kjaergaard, H. G., Keutsch, F. N. and Wennberg, P. O.: Kinetics and products of the reaction of the first-

168 generation isoprene hydroxy hydroperoxide (ISOPOOH) with OH, J. Phys. Chem. A, 120, 1441-1451,  
169 doi: 10.1021/acs.jpca.5b06532, 2016.

170 Winkelman, J. G. M., Ottens, M. and Beenackers, A. A. C. M.: The kinetics of the dehydration of  
171 methylene glycol, Chem. Eng. Sci., 55, 2065-2071, doi: 10.1016/S0009-2509(99)00498-4, 2000.

172 Winkelman, J. G. M., Voorwinde, O. K., Ottens, M., Beenackers, A. A. C. M. and Janssen, L. P. B. M.:  
173 Kinetics and chemical equilibrium of the hydration of formaldehyde, Chem. Eng. Sci., 57, 4067-4076,  
174 doi: 10.1016/S0009-2509(02)00358-5, 2002.

175

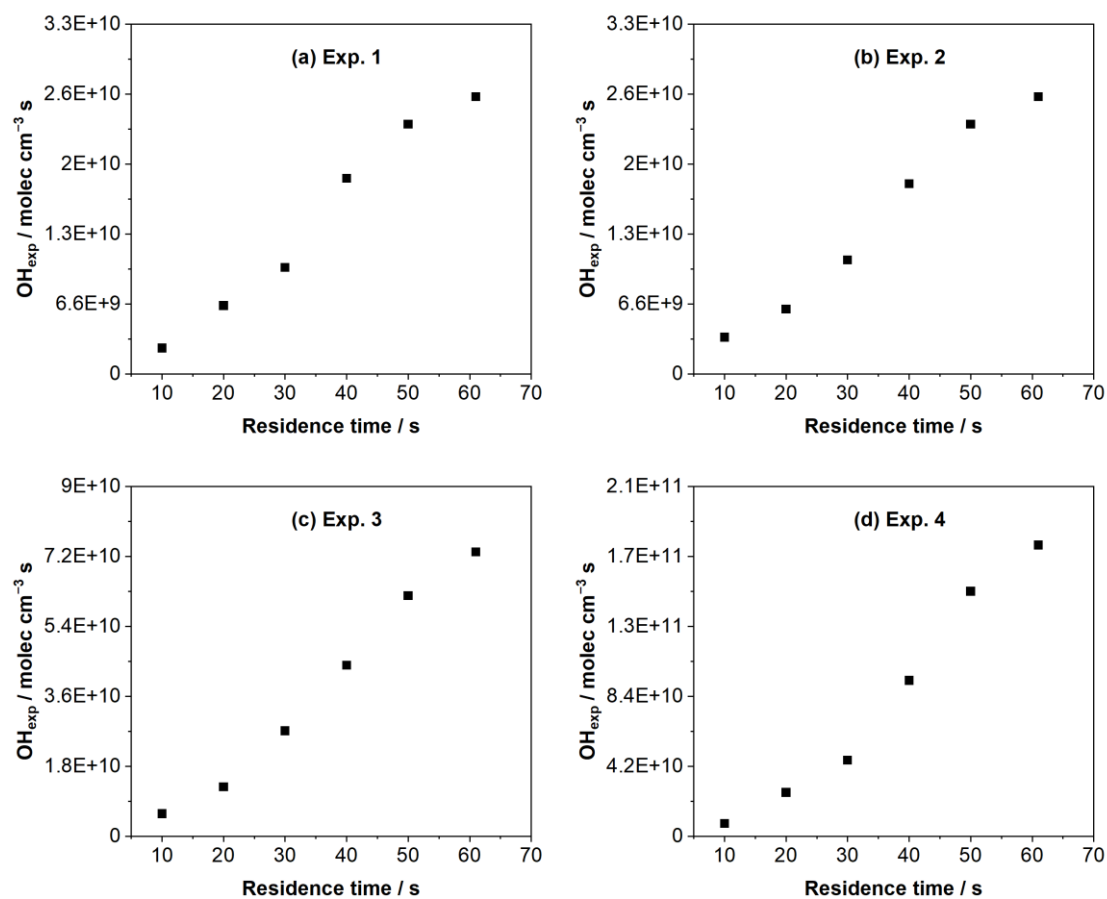

**Figure S1:** The evolution of  $\text{OH}_{\text{exp}}$  with residence time in Exp. 1–4 (a–d).

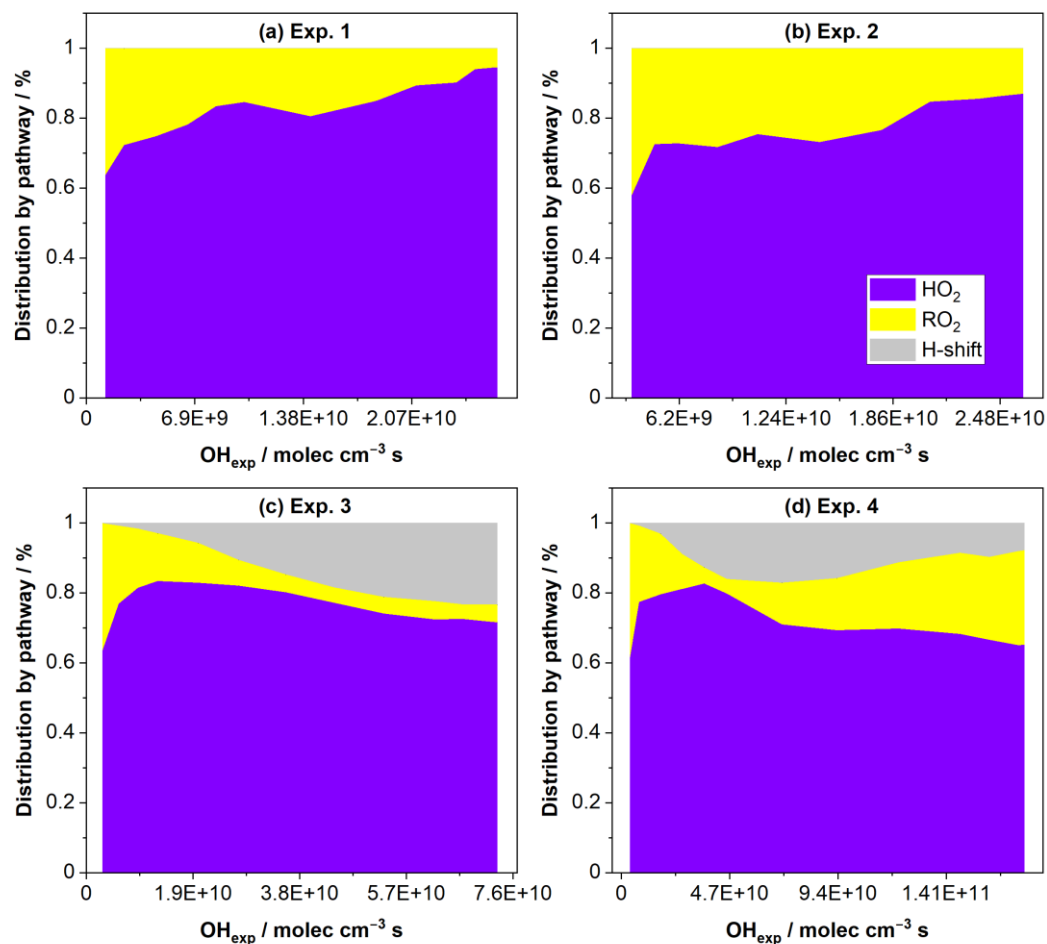

**Figure S2:** Distribution of reaction pathways of major RO<sub>2</sub> in the experiments. Major RO<sub>2</sub> refers to RO<sub>2</sub> species which consist of more than 90 % of total RO<sub>2</sub> concentrations. In (a) Exp. 1 and (b) Exp. 2 it refers to β-ISOPPOO, while in (c) Exp. 3 and (d) Exp. 4 refers to the assembly of a series of RO<sub>2</sub>.

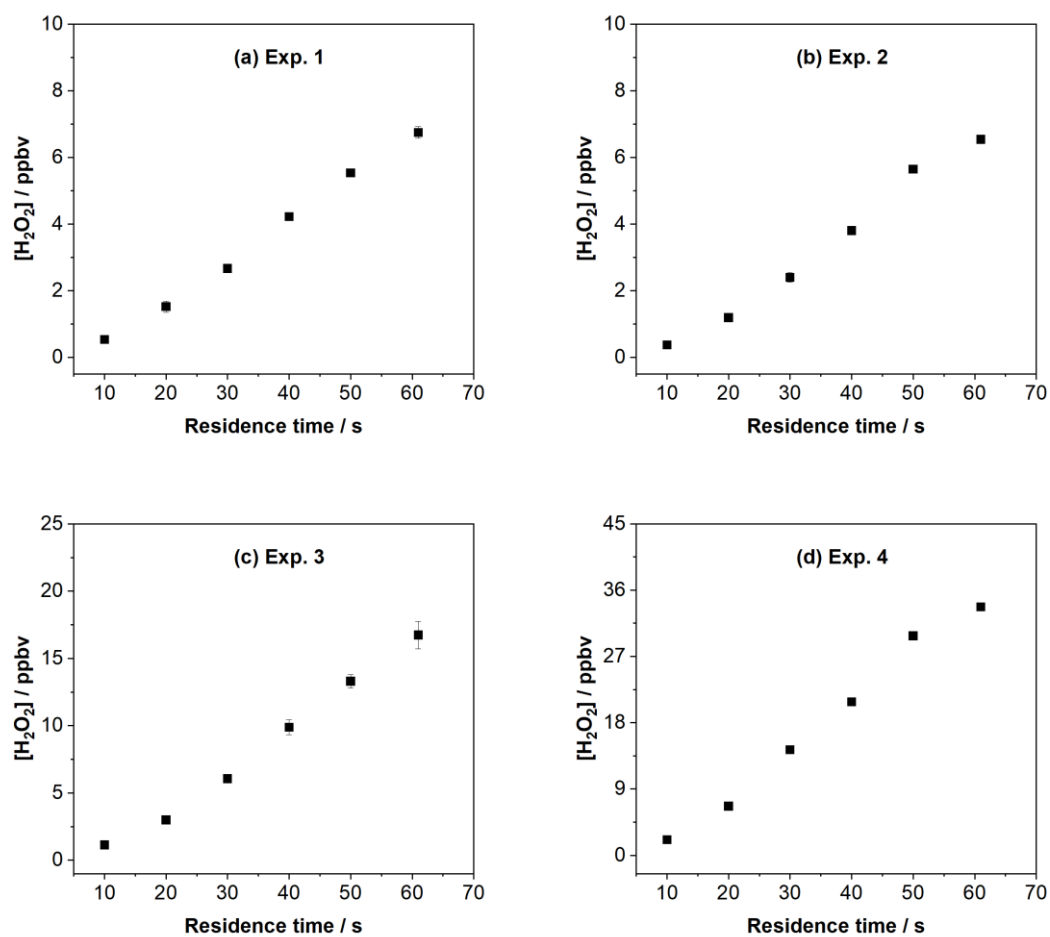

**Figure S3:** The observed evolution of  $\text{H}_2\text{O}_2$  concentration in the experiments. Corrections have been made to eliminate photolysis and wall loss of  $\text{H}_2\text{O}_2$ . The error bars represent  $\pm$  standard deviation ( $\pm$  SD) based on 6 measurements.

189 **Table S1:** Collection efficiencies for different species by the rinsing solution ( $5 \times 10^{-3}$  M H<sub>3</sub>PO<sub>4</sub> or  
190 ultrapure water) in the coiling tube at 277 K.

| Species      | Henry's law constant<br>at 277 K/M atm <sup>-1</sup> | Collection efficiency | References           |
|--------------|------------------------------------------------------|-----------------------|----------------------|
| FA           | 4.20E+04                                             | 99.5 %                | Sander (2015)        |
| AA           | 2.00E+04                                             | 98.9 %                |                      |
| H2O2         | 5.80E+05                                             | 100.0 %               |                      |
| HMHP         | 2.10E+07                                             | 100.0 %               |                      |
| PFA          | 2.90E+03 <sup>a</sup>                                | 92.8 %                |                      |
| MHP          | 1.20E+03                                             | 84.3 %                |                      |
| PAA          | 3.20E+03                                             | 93.5 %                | Dovrou et al. (2019) |
| 1,2-ISOPPOOH | 7.00E+05 <sup>b</sup>                                | 100.0 %               |                      |
| 4,3-ISOPPOOH | 8.00E+04 <sup>b</sup>                                | 99.7 %                |                      |

191 Note: Henry’s law constant at <sup>a</sup>278 K and <sup>b</sup>298 K.

192

193 **Table S2:** First-order wall loss rate constants ( $k_{WALL,i}$ ) of the concerned products in the OFR.

| Rate constants/s <sup>-1</sup> | Species | RH = 30 % | RH = 80 % | References           |
|--------------------------------|---------|-----------|-----------|----------------------|
| Carbonyls                      | HCHO    | 1.70E-04  | 1.70E-04  | Gong et al. (2018)   |
|                                | HACE    | 3.02E-04  | 4.84E-04  |                      |
|                                | GLY     | 3.93E-04  | 4.99E-04  |                      |
|                                | MGL     | 4.86E-04  | 6.04E-04  |                      |
| Peroxides                      | H2O2    | 2.97E-04  | 1.71E-03  | Huang et al. (2013)  |
|                                | PAA     | 1.71E-03  | 3.47E-03  |                      |
|                                | HMHP    | 2.39E-03  | 4.83E-03  |                      |
|                                | PFA     | 2.14E-04  | 4.01E-04  | Gong et al. (2018)   |
| Organic acids                  | AA      | 3.47E-04  | 3.47E-04  | Gong and Chen (2021) |

194

195

196 **Table S3:** First-order photolysis rate constants ( $k_{PH,i}$ ) of the concerned products in the OFR.

| Species | Photon flux at 254<br>nm/photons cm <sup>-2</sup> s <sup>-1</sup> | Absorption Cross-<br>section/cm <sup>2</sup> molec <sup>-1</sup> | Quantum Yield | Rate constants/s <sup>-1</sup> |
|---------|-------------------------------------------------------------------|------------------------------------------------------------------|---------------|--------------------------------|
| O3      | 1.57E+15                                                          | 1.14E-17                                                         | 1             | 1.80E-02                       |
| HCHO    | 1.57E+15                                                          | 4.56E-21                                                         | 0.8           | 5.74E-06                       |
| GLY     | 1.57E+15                                                          | 1.6E-20                                                          | 1             | 2.52E-05                       |
| MGL     | 1.57E+15                                                          | 2.859E-20                                                        | 1             | 4.50E-05                       |
| MACR    | 1.57E+15                                                          | 1.78E-21                                                         | 0.05          | 1.40E-07                       |
| MVK     | 1.57E+15                                                          | 2.41E-21                                                         | 0.69          | 2.62E-06                       |
| H2O2    | 1.57E+15                                                          | 6.7E-20                                                          | 1             | 1.06E-04                       |
| MHP     | 1.57E+15                                                          | 3.23E-20                                                         | 1             | 5.09E-05                       |

197

198



199 **Table S4:** Second-order reaction rate constants of the concerned products with OH radicals at 298 K  
200 (  $k_{PRO,i+OH}$  ). The reaction rate constants were abstracted from MCM v3.3.1 website  
201 (<http://mcm.york.ac.uk/home.htm>) except for that of HMHP and  $\beta$ -ISOPOOH, which were abstracted from  
202 Allen et al. (2018) and St Clair et al. (2016), separately.

|               | Species              | Rate constants/cm <sup>3</sup> molec <sup>-1</sup> s <sup>-1</sup> |
|---------------|----------------------|--------------------------------------------------------------------|
| Carbonyls     | HCHO                 | 8.49E-12                                                           |
|               | HACE                 | 4.45E-12                                                           |
|               | GLY                  | 9.70E-12                                                           |
|               | MGL                  | 1.31E-11                                                           |
|               | MACR                 | 2.68E-11                                                           |
|               | MVK                  | 2.01E-11                                                           |
| Peroxides     | H2O2                 | 1.70E-12                                                           |
|               | PAA                  | 3.70E-12                                                           |
|               | HMHP                 | 7.10E-12                                                           |
|               | MHP                  | 1.00E-11                                                           |
|               | $\beta$ -1,2-ISOPOOH | 7.50E-11                                                           |
|               | $\beta$ -4,3-ISOPOOH | 1.18E-10                                                           |
| Organic acids | AA                   | 8.00E-13                                                           |
|               | FA                   | 4.50E-13                                                           |

203  
204

205 **Table S5:** Relative abundance of RO<sub>2</sub> (HO<sub>2</sub>) water complexes ( $R_{RO_2(HO_2) \cdot H_2O}$ ) at 298 K under 30 % and  
 206 80 % RH.

|           | β-1,2-ISOPPOO | β-4,3-ISOPPOO | β-HEP  | HO <sub>2</sub> |
|-----------|---------------|---------------|--------|-----------------|
| RH = 30 % | 0.27 %        | 0.74 %        | 0.72 % | 4.41 %          |
| RH = 80 % | 0.71 %        | 1.96 %        | 1.91 % | 11.0 %          |

207

**Table S6:** Advanced mechanisms and kinetics of isoprene photooxidation to MCM v3.3.1 in the modeling in this study.

| S/N | Reactions                                                                                                                        | RH dependent rate constants at 298 K <sup>a</sup>                                                                                                                 | Reference                                     |
|-----|----------------------------------------------------------------------------------------------------------------------------------|-------------------------------------------------------------------------------------------------------------------------------------------------------------------|-----------------------------------------------|
| 1   | $\beta$ -1,2-ISOPRO + HO <sub>2</sub> → $\beta$ -1,2-ISOPROOH + O <sub>2</sub>                                                   | $(1.74 \times 10^{-11} + 1.49 \times 13.2 \times 10^{-44} \times e^{9538/T} \times [H_2O]) \times (1 - 4.25 \times 10^{-19} \times [H_2O] + 7.18 \times 10^{-2})$ | Boyd et al. (2003) <sup>b</sup><br>This study |
| 2   | $\beta$ -4,3-ISOPRO + HO <sub>2</sub> → $\beta$ -4,3-ISOPROOH + O <sub>2</sub>                                                   | $(1.74 \times 10^{-11} + 2.47 \times 13.2 \times 10^{-44} \times e^{9538/T} \times [H_2O]) \times (1 - 4.25 \times 10^{-19} \times [H_2O] + 7.18 \times 10^{-2})$ |                                               |
| 3   | $\beta$ -1,2-ISOPRO + HO <sub>2</sub> → MVK + O <sub>2</sub> + OH + CH <sub>2</sub> OH                                           | $(1.74 \times 10^{-11} + 1.49 \times 13.2 \times 10^{-44} \times e^{9538/T} \times [H_2O]) \times (4.25 \times 10^{-19} \times [H_2O] + 7.18 \times 10^{-2})$     |                                               |
| 4   | $\beta$ -4,3-ISOPRO + HO <sub>2</sub> → MACR + O <sub>2</sub> + OH + CH <sub>2</sub> OH                                          | $(1.74 \times 10^{-11} + 2.47 \times 13.2 \times 10^{-44} \times e^{9538/T} \times [H_2O]) \times (4.25 \times 10^{-19} \times [H_2O] + 7.18 \times 10^{-2})$     |                                               |
| 5   | CH <sub>2</sub> OH + O <sub>2</sub> → HOCH <sub>2</sub> OO                                                                       | $1.03 \times 10^{-11}$                                                                                                                                            | Grotheer et al. (1985)                        |
| 6   | CH <sub>2</sub> OH + CH <sub>2</sub> OH → C <sub>2</sub> H <sub>6</sub> O <sub>2</sub>                                           | $1.50 \times 10^{-11}$                                                                                                                                            | Grotheer et al. (1985)                        |
| 7   | HOCH <sub>2</sub> OO → HCHO + HO <sub>2</sub>                                                                                    | $1.53 \times 10^2$                                                                                                                                                | Atkinson et al. (2006)                        |
| 8   | HOCH <sub>2</sub> OO + HO <sub>2</sub> → HOCH <sub>2</sub> OOH + O <sub>2</sub>                                                  | $1.25 \times 10^{-11} \times 0.6$                                                                                                                                 |                                               |
| 9   | HOCH <sub>2</sub> OO + HO <sub>2</sub> → HCOOH + H <sub>2</sub> O + O <sub>2</sub>                                               | $1.25 \times 10^{-11} \times 0.4$                                                                                                                                 |                                               |
| 10  | HOCH <sub>2</sub> O <sub>2</sub> + HOCH <sub>2</sub> O <sub>2</sub> → HCOOH + CH <sub>2</sub> (OH) <sub>2</sub> + O <sub>2</sub> | $7.05 \times 10^{-13}$                                                                                                                                            |                                               |
| 11  | HOCH <sub>2</sub> O <sub>2</sub> + HOCH <sub>2</sub> O <sub>2</sub> → HOCH <sub>2</sub> O + HOCH <sub>2</sub> O + O <sub>2</sub> | $5.54 \times 10^{-12}$                                                                                                                                            |                                               |
| 12  | HCHO + HO <sub>2</sub> → HOCH <sub>2</sub> OO                                                                                    | $7.90 \times 10^{-14}$                                                                                                                                            | Jenkin et al. (2007)                          |
| 13  | CH <sub>2</sub> (OH) <sub>2</sub> → HCHO + H <sub>2</sub> O                                                                      | $8.49 \times 10^{-3}$                                                                                                                                             | Winkelman et al. (2000)                       |
| 14  | HCHO + H <sub>2</sub> O → CH <sub>2</sub> (OH) <sub>2</sub>                                                                      | $3.23 \times 10^{-22}$                                                                                                                                            | Winkelman et al. (2002)                       |
| 15  | CH <sub>2</sub> (OH) <sub>2</sub> + OH → CH(OH) <sub>2</sub> + H <sub>2</sub> O                                                  | $1.30 \times 10^{-12}$                                                                                                                                            | Monod et al. (2000)                           |
| 16  | CH(OH) <sub>2</sub> + O <sub>2</sub> → HCOOH + HO <sub>2</sub>                                                                   | $5.81 \times 10^{-12}$                                                                                                                                            | McElroy and                                   |
| 17  | CH(OH) <sub>2</sub> + CH(OH) <sub>2</sub> → HCOOH + CH <sub>2</sub> (OH) <sub>2</sub>                                            | $2.33 \times 10^{-12}$                                                                                                                                            | Waygood (1991)                                |
| 18  | CH(OH) <sub>2</sub> + OH → HCOOH + H <sub>2</sub> O                                                                              | $5.81 \times 10^{-15}$                                                                                                                                            |                                               |

<sup>a</sup> Units: cm<sup>3</sup> molec<sup>-1</sup> s<sup>-1</sup> for second-order reactions; s<sup>-1</sup> for first-order reactions.<sup>b</sup> The reaction rate constant of ISOPRO + HO<sub>2</sub> under dry conditions at 298 K,  $1.74 \times 10^{-11}$  cm<sup>3</sup> molec<sup>-1</sup> s<sup>-1</sup>, was abstracted from Boyd et al. (2003).
